# Supplementary material for: Maternal and Fetal Effects of Gestational Vitamin D Concentration
Source: MDPI journal article supplement (doi:10.3390/healthcare11162325), 2023-08-17
Supplement: s1 [file s1]

**Table S1.** Pregnancy women characteristics of the distribution

| Independent variables            |                 | Percent (%) | Total (%) |
|----------------------------------|-----------------|-------------|-----------|
| Race                             | a. Asian people | 48 (100)    | 48 (100)  |
|                                  | b. Black people | 0           |           |
|                                  | c. White people | 0           |           |
| Urban status <sup>1</sup>        | a. Urban        | 48 (100)    | 48 (100)  |
|                                  | b. Mountainous  | 0           |           |
| Age groups                       | a. 20-30        | 13 (27.08)  | 48 (100)  |
|                                  | b. 31-41        | 35 (72.91)  |           |
| ABO type                         | a. A Type       | 19 (39.58)  | 48 (100)  |
|                                  | b. B Type       | 13 (27.08)  |           |
|                                  | c. AB Type      | 7 (14.58)   |           |
|                                  | d. O Type       | 9 (18.75)   |           |
| Rh(D) typing                     | a. Positive     | 48 (100)    | 48 (100)  |
|                                  | b. Negative     | 0           |           |
| Smoking status                   | a. Yes          | 0           | 48 (100)  |
|                                  | b. No           | 48 (100)    |           |
| Hepatitis B virus                | a. Hbs Ag       | 12 (25.0)   | 48 (100)  |
|                                  | b. Hbs Ab       | 36 (75.0)   |           |
| Hepatitis C virus<br>(anti-body) | a. Yes          | 0           | 48 (100)  |
|                                  | b. No           | 48 (100)    |           |
| HIV AB                           | a. Yes          | 0           | 48 (100)  |
|                                  | b. No           | 48 (100)    |           |

<sup>1</sup>Urban status divided by location at urban area
